# Supplementary material for: Modulation of lithium iron phosphate electrode architecture by magnetic ordering for lithium-ion batteries
Source: Royal Society of Chemistry journal article supplement (doi:10.1039/d4ta02647k), 2024-01-01
Supplement: d4ta02647k1.pdf [file d4ta02647k1.pdf]

## Supplementary Information

# Modulation of Lithium Iron Phosphate Electrode Architecture by Magnetic Ordering for Lithium-Ion Batteries

Wontak Kim,<sup>a,b</sup> Chihyun Hwang,<sup>a</sup> Yong Min Kim,<sup>c</sup> Ji-Sang Yu,<sup>a</sup> Young-Jun Kim,<sup>b,d\*</sup>

Ki Jae Kim,<sup>c,d\*</sup>, and Hyun-seung Kim<sup>a\*</sup>

<sup>a</sup> Advanced Batteries Research Center, Korea Electronics Technology Institute, 25, Saenari-ro, Seongnam 13509, Republic of Korea.

<sup>b</sup> SKKU Advanced Institute of Nano Technology (SAINT), Sungkyunkwan University, Suwon, 16419, Republic of Korea.

<sup>c</sup> Department of Energy Science, Sungkyunkwan University, Suwon 16419, Republic of Korea.

<sup>d</sup> SKKU Institute of Energy Science and Technology (SIEST), Sungkyunkwan University, Suwon 16419, Republic of Korea.

\* Corresponding Authors:

yjkim68@skku.edu, kijaekim@skku.edu, hskim0113@keti.re.kr

## Experimental section

### 1. Electrode casting and pouch-cell fabrication

The positive electrode was prepared using a dispersion of  $\text{LiFePO}_4$  (LFP, Johnson Matthey), Super P (TIMCAL), and polyvinylidene fluoride (PVdF, Solef-5130, Solvey) in *N*-methyl-2-pyrrolidone (NMP, Sigma-Aldrich) at a *wt. %* of 90:5:5. The LFP electrodes were identically fabricated with 90:5:5 with LFP: flake graphite (TIMCAL, SFG-6) or  $\text{Fe}_3\text{O}_4$  (Sigma Aldrich, 50-100 nm sized) : PVdF composition. The resulting slurry was cast on an Al foil and subjected to magnetic treatment with a neodymium magnet during drying. The cast electrode was pre-dried at 80 °C and dried under vacuum for 12 h at 120 °C before cell fabrication. The electrode was pressed to reach the electrode density with 2.0 g cm<sup>-3</sup>. The negative electrode was composed of graphite (BTR), Super P (TIMCAL), styrene-butadiene rubber (SBR, Sigma-Aldrich), and carboxymethyl cellulose (CMC, Sigma-Aldrich) (SBR: CMC = 1:1 weight ratio) at a *wt. %* of 90:5:5. The water-based slurry was cast on a Cu foil and the coated electrode was pre-dried at 80 °C under vacuum for 12 h before cell assembly. A monolayered pouch cell was assembled with the positive electrode, polyethylene (PE) separator, and negative electrode. The cell had a negative to positive electrode capacity ratio (N/P ratio) of 1.08.

### 2. Electrochemical characterization of pouch cells

Electrochemical characterization of the graphite/LFP pouch cells was conducted. A blend of 1.0 M  $\text{LiPF}_6$  in ethylene carbonate (EC)/ethyl methyl carbonate (EMC) (3:7 = *v/v*) was injected to soak the electrode and separator into the electrolyte. Subsequently, the pouch cell was constructed after 24 h of aging in room temperature. The pouch cells were subjected to 0.1 C constant current (CC)-constant voltage (CV) cycles at a voltage range of 2.5–3.8 V at a cut off of 0.05 C using a galvanostatic cycler (TOYO, Japan). After cell formation, 1.0 C CC–CV charge (0.05 C cut-off) and 1.0 C discharge currents were applied to evaluate the cycle

performance. The direct current resistance (DC- $iR$ ) was measured by applying 2.5  $C$  of current pulse with 1 min and 30 min of rest periods at an SOC of 50%. EIS was performed within the frequency range of 3.0 MHz–1.0 mHz using LFP/LFP symmetric cells with a 2032 coin-cell structure. The SOC of the charged pouch cells was 50% and the voltage amplitude was 5.0 mV. Galvanostatic intermittent titration technique was applied to compare the developed polarization at pristine and magnet-treated electrodes. The 10 min of 16 mA  $g^{-1}$  CC and 30 min of rest period was performed with lithiation step of the LFP electrodes. The polarization was calculated by subtracting closed-circuit voltages from quasi open-circuit voltages.

### *3. Morphology and surface analysis*

Structural analysis of the electrode was conducted via X-ray microscopy (SKYSCAN 2214 CMOS). The surface composition of the cycled electrode was analyzed via XPS (ThermoFisher). The analyzed electrodes were disassembled in an Ar-filled glove box and washed with EMC solvents. The positive electrodes were examined via SEM (JEOL) after polishing their cross-sectional areas.

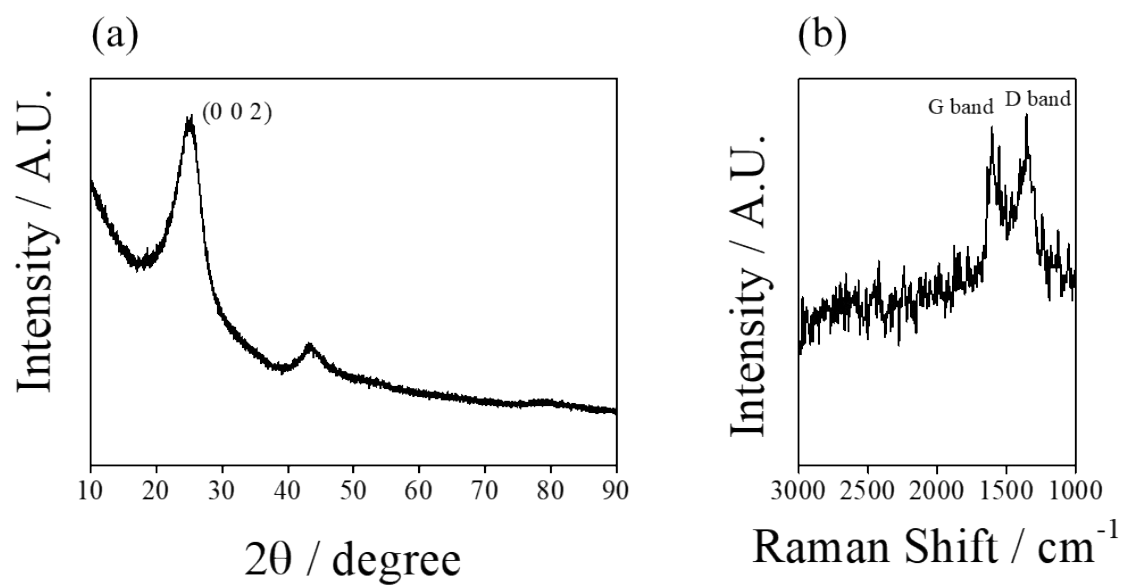

**Figure S1** (a) XRD and (b) Raman spectrum obtained from the carbon additive

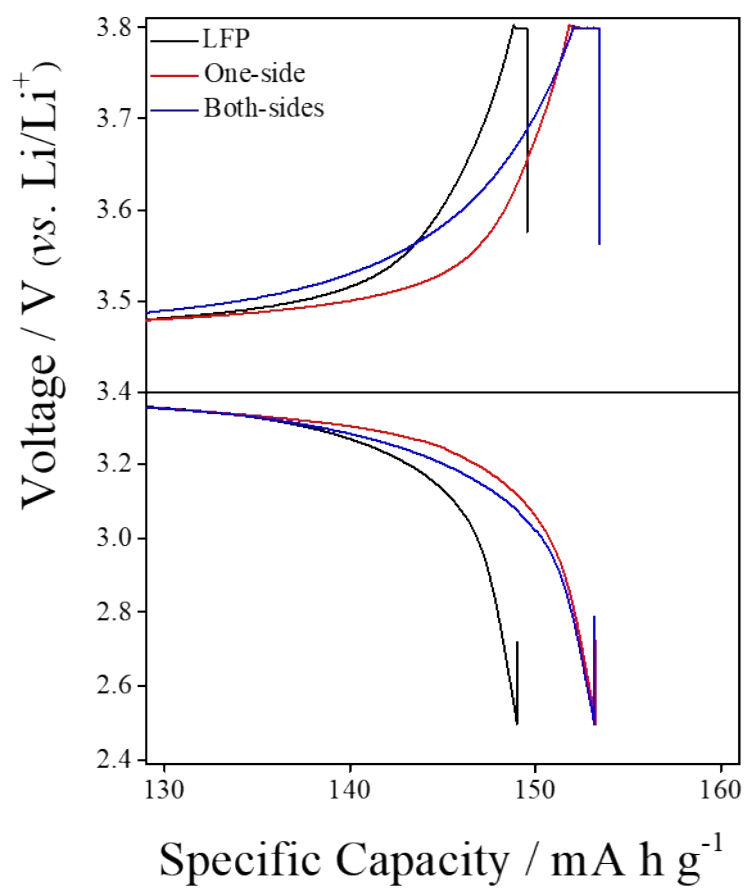

**Figure S2** Voltage profiles from the Li/LFP cell with pristine, one-side and both-side magnet treated electrodes

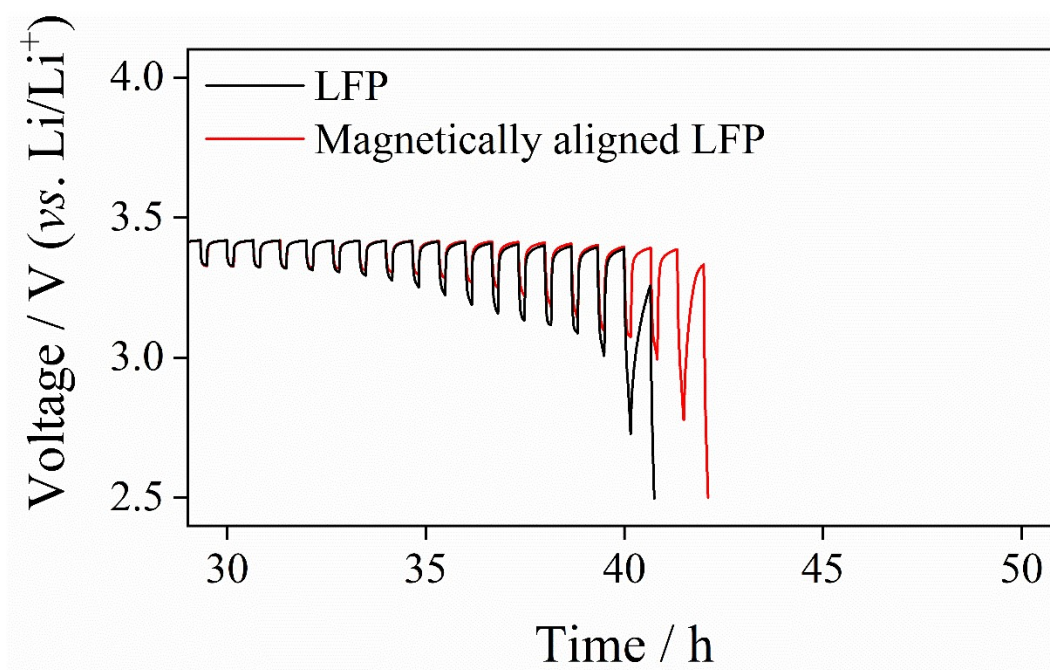

**Figure S3.** Time *versus* voltage curves obtained from the galvanostatic intermittent titration technique evaluation at Li/LFP coin cell

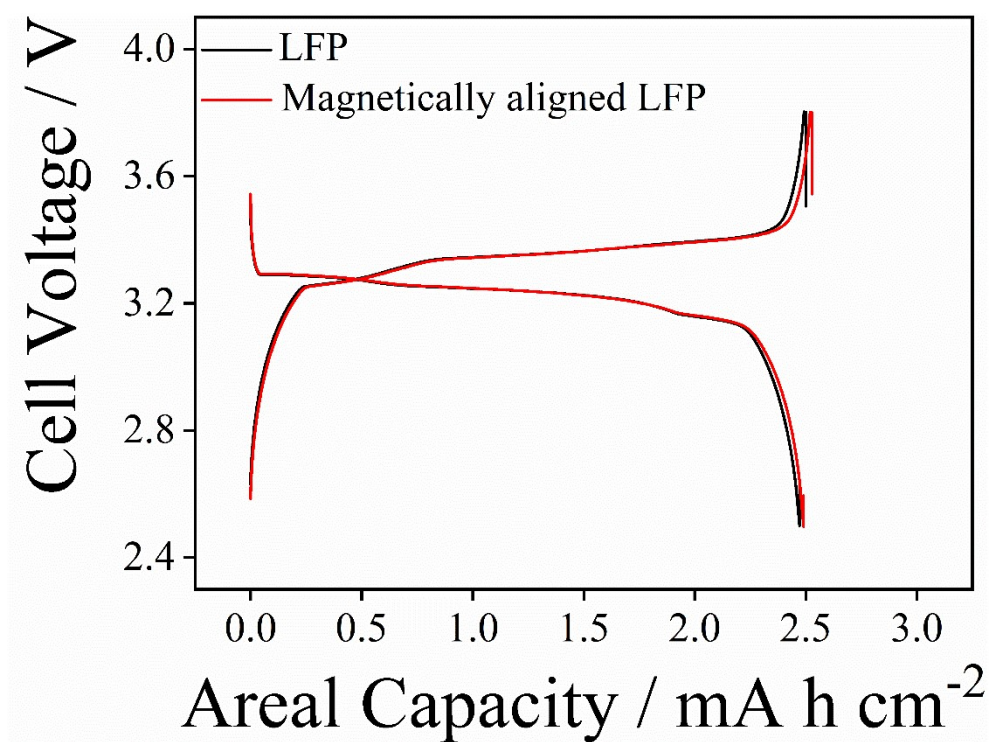

**Figure S3** Voltage profiles from the graphite/LFP cell employing pristine and magnet treated LFP electrodes

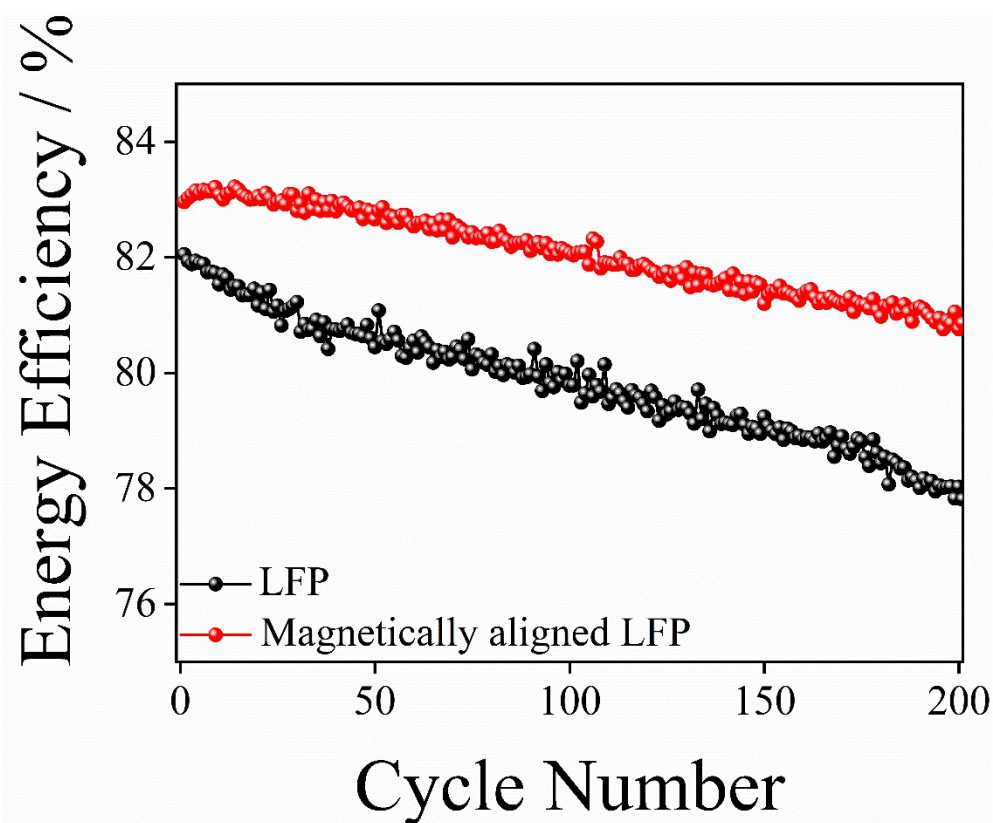

**Figure S4** Energy efficiency obtained from the graphite/LFP cell with pristine and magnetically ordered LFP electrodes



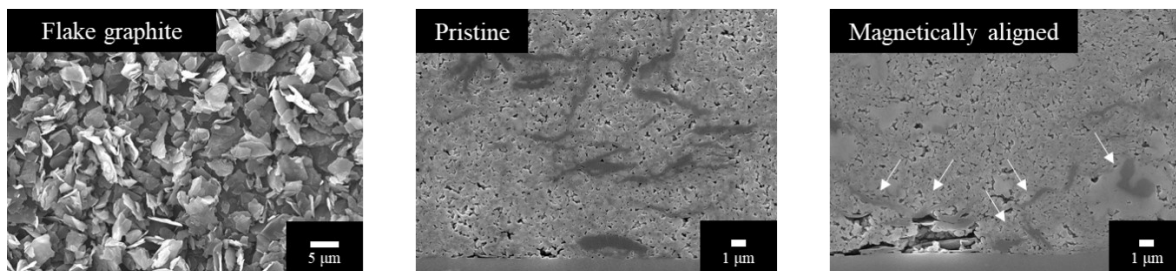

**Figure S5.** SEM images of flake graphite, pristine LFP electrode with flake graphite, and the magnetic field applied LFP electrode with flake graphite

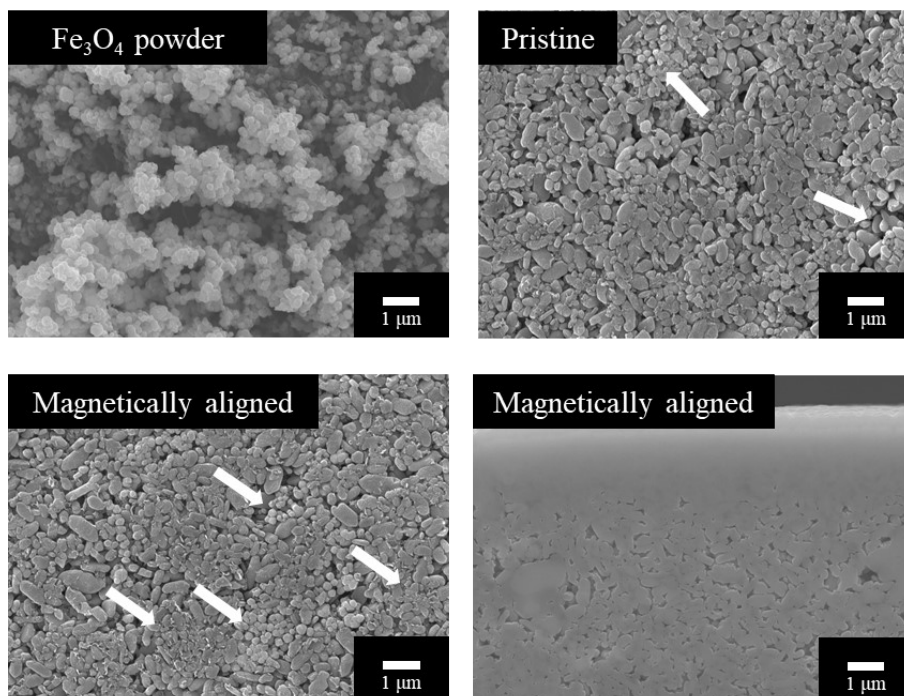

**Figure S6.** SEM images of applied Fe<sub>3</sub>O<sub>4</sub> powder, pristine LFP electrode with Fe<sub>3</sub>O<sub>4</sub>, and the magnetic field applied LFP electrode with Fe<sub>3</sub>O<sub>4</sub> at topmost and cross-section

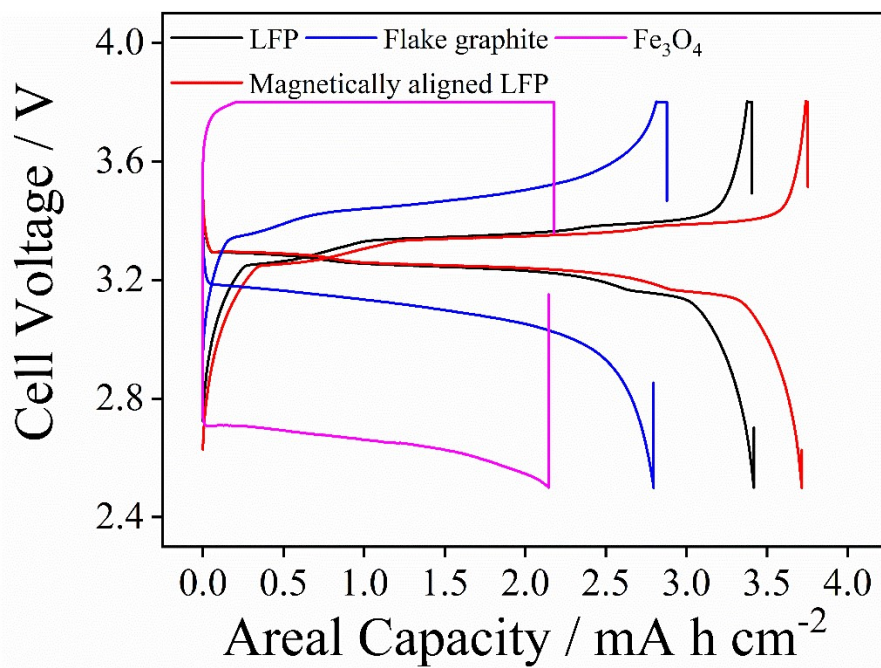

**Figure S7.** Initial formation voltage profiles obtained from the graphite/LFP pouch cells with differently designed electrodes.

**Table S1.** Design parameter of the evaluated graphite/LFP pouch cell

|                                           | <b>Design parameter</b> | <b>Value</b>               |
|-------------------------------------------|-------------------------|----------------------------|
| LiFePO <sub>4</sub><br>positive electrode | Discharge capacity      | 155 mA h g <sup>-1</sup>   |
|                                           | Initial efficiency      | 99.9 %                     |
|                                           | Active material ratio   | 90.0 %                     |
|                                           | Mass loading            | 19.46 mg cm <sup>-2</sup>  |
|                                           | Areal capacity          | 3.0 mA h cm <sup>-2</sup>  |
|                                           | Electrode density       | 2.0 g cm <sup>-3</sup>     |
| Graphite<br>negative electrode            | Discharge capacity      | 332 mA h g <sup>-1</sup>   |
|                                           | Initial efficiency      | 89.9%                      |
|                                           | Active material ratio   | 90 %                       |
|                                           | Mass loading            | 9.81 mg cm <sup>-2</sup>   |
|                                           | Areal capacity          | 3.26 mA h cm <sup>-2</sup> |
|                                           | Electrode density       | 1.6 g cm <sup>-3</sup>     |
| Cell                                      | NP ratio                | 1.08                       |
